# Supplementary material for: Analysis of the Antiproliferative Effect of Ankaferd Hemostat on Caco-2 Colon Cancer Cells via LC/MS Shotgun Proteomics Approach
Source: Biomed Res Int. 2019 May 21;2019:5268031. doi: 10.1155/2019/5268031 (PMC6556321; doi:10.1155/2019/5268031)
Supplement: Supplementary Materials — Table S1. In proteomics analysis of Caco-2 cells, 711 proteins were identified in control and Ankaferd (ABS) treated groups. The identified proteins with their names and gene symbols are presented in Table 1. Table S2. The list of down- and upregulated proteins under ABS stress with their gene symbols and fold changes (p<0.05) [file 5268031.f1.zip]

Archive with 3 entries (2 files):
- 5268031.f1/
- 5268031.f1/Table S1. Supplementary Material Description_BMRI_2767460.docx
- 5268031.f1/Table S2. Supplementary Material description_BMRI_2767462.docx
